# Supplementary material
Source: PubMed Central journal article supplement (PMC3686345)
Supplement: mmc1.pdf [file mmc1.pdf]

# **An Embryonic Myosin Isoform Enables Stretch Activation and Cyclical Power in *Drosophila* Jump Muscle**

Cuiping Zhao and Douglas M. Swank\*

Department of Biology and Center for Biotechnology and Interdisciplinary Studies, Rensselaer Polytechnic Institute, Troy, New York

Zhao and Swank

Myosin Isoform Enables Stretch Activation

*Submitted January 14, 2013, and accepted for publication April 29, 2013.*

\*Correspondence: [swankd@rpi.edu](mailto:swankd@rpi.edu)

**Table 1. Work and power generation from jump muscle fibers at three phosphate concentrations**

| Pi (mM) | Control Fibers                      |                                     | EMB Fibers                          |                                     | EMB fibers                          |                                      |
|---------|-------------------------------------|-------------------------------------|-------------------------------------|-------------------------------------|-------------------------------------|--------------------------------------|
|         | Negative work (nJ/mm <sup>3</sup> ) | Positive work (nJ/mm <sup>3</sup> ) | Negative work (nJ/mm <sup>3</sup> ) | Positive work (nJ/mm <sup>3</sup> ) | Work loop Power (W/m <sup>3</sup> ) | Sinusoidal Power (W/m <sup>3</sup> ) |
| 0       | -152.6±19.8(9)                      | 147.9±19.3(9)                       | -432.2±45.1(9)                      | 361.3±59.1(9)                       | -4.8±1.8 (9)                        | <0 (21)                              |
| 8       | -106.6 ±17.2(8)                     | 103.4±16.5(8)                       | -238.9±22.4(10)*                    | 239.4±22.5(10)*                     | 1.3±1.6 (10)*                       | 2.1±0.4 (21)*                        |
| 16      | -64.7±8.0(7)*                       | 63.0±7.8 (7)*                       | -221.9±16.2(9)*                     | 223.1±16.0(9)*                      | 8.1±2.9 (10)*                       | 3.6±0.5 (21)*                        |

Negative work is work done while the fiber is being lengthened. Positive work is work done while shortening. Two techniques of measuring power, work loops and sinusoidal analysis, both showed that EMB generated positive power at 8 and 16 mM Pi. Values are mean ± S.E.M. (N) \* P<0.05 significantly different from 0mM Pi, student's *t-test*.
